# Supplementary material for: Epidemiologic, Phenotypic, and Structural Characterization of Aminoglycoside-Resistance Gene aac(3)-IV
Source: PubMed Central journal article supplement (PMC7504452; doi:10.3390/ijms21176133), 2020-08-25
Supplement: ijms-21-06133-s001.pdf [file ijms-21-06133-s001.pdf]

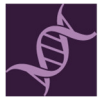

**Table S1.** Prevalence of apramycin- vs. RMTase resistance gene annotations in human clinical isolates deposited in the NCBI National Database of Antibiotic Resistant Organisms (NDARO) as of June 24, 2020.

|                           | Clinical Isolate Resistance Gene Annotations |                  |       |             |       |             |       |             |       |               |        |
|---------------------------|----------------------------------------------|------------------|-------|-------------|-------|-------------|-------|-------------|-------|---------------|--------|
|                           | Total                                        | <i>aac(3)-IV</i> |       | <i>apmA</i> |       | <i>npmA</i> |       | <i>kamB</i> |       | <i>RMTase</i> |        |
|                           | <i>n</i>                                     | <i>n</i>         | %     | <i>n</i>    | %     | <i>n</i>    | %     | <i>n</i>    | %     | <i>n</i>      | %      |
| <b>All genomes</b>        | 182,405                                      | 1,265            | 0.69% | 2           | 0.00% | 2           | 0.00% | 0           | 0.00% | 4,941         | 2.71%  |
| <b>Gram-negatives</b>     |                                              |                  |       |             |       |             |       |             |       |               |        |
| <i>A. baumannii</i>       | 5,728                                        | 1                | 0.02% | 0           | 0.00% | 0           | 0.00% | 0           | 0.00% | 2,150         | 37.53% |
| <i>P. aeruginosa</i>      | 4,940                                        | 3                | 0.06% | 0           | 0.00% | 0           | 0.00% | 0           | 0.00% | 47            | 0.95%  |
| <i>E. coli / Shigella</i> | 37,283                                       | 298              | 0.80% | 0           | 0.00% | 0           | 0.00% | 0           | 0.00% | 300           | 0.80%  |
| <i>K. pneumoniae</i>      | 14,999                                       | 485              | 3.23% | 0           | 0.00% | 0           | 0.00% | 0           | 0.00% | 2,250         | 15.00% |
| <i>K. oxytoca</i>         | 478                                          | 0                | 0.00% | 0           | 0.00% | 0           | 0.00% | 0           | 0.00% | 14            | 2.93%  |
| <i>Enterobacter</i> spp.  | 2,352                                        | 6                | 0.26% | 0           | 0.00% | 0           | 0.00% | 0           | 0.00% | 117           | 4.97%  |
| <i>S. marcescens</i>      | 786                                          | 1                | 0.13% | 0           | 0.00% | 0           | 0.00% | 0           | 0.00% | 7             | 0.89%  |
| <i>C. freundii</i>        | 472                                          | 1                | 0.21% | 0           | 0.00% | 0           | 0.00% | 0           | 0.00% | 26            | 5.51%  |
| <i>M. morgani</i>         | 47                                           | 2                | 4.26% | 0           | 0.00% | 0           | 0.00% | 0           | 0.00% | 3             | 6.38%  |
| <i>S. enterica</i>        | 68,418                                       | 451              | 0.66% | 0           | 0.00% | 0           | 0.00% | 0           | 0.00% | 11            | 0.02%  |
| <i>C. jejuni</i>          | 9,681                                        | 0                | 0.00% | 2           | 0.02% | 0           | 0.00% | 0           | 0.00% | 0             | 0.00%  |
| <b>Gram-positives</b>     |                                              |                  |       |             |       |             |       |             |       |               |        |
| <i>C. difficile</i>       | 2,319                                        | 0                | 0.00% | 0           | 0.00% | 2           | 0.09% | 0           | 0.00% | 0             | 0.00%  |
| <i>E. faecium</i>         | 7,215                                        | 0                | 0.00% | 0           | 0.00% | 0           | 0.00% | 0           | 0.00% | 0             | 0.00%  |

**Table S2.** Prevalence of apramycin- vs. RMTase resistance gene annotations in the carbapenemase-positive subpopulation of human clinical isolates deposited in the NCBI National Database of Antibiotic Resistant Organisms (NDARO) as of June 24, 2020.

|                           | Carbapenemase-Positive Clinical Isolate Resistance Gene Annotations |                  |       |             |       |             |       |             |       |               |        |
|---------------------------|---------------------------------------------------------------------|------------------|-------|-------------|-------|-------------|-------|-------------|-------|---------------|--------|
|                           | Total                                                               | <i>aac(3)-IV</i> |       | <i>apmA</i> |       | <i>npmA</i> |       | <i>kamB</i> |       | <i>RMTase</i> |        |
|                           | <i>n</i>                                                            | <i>n</i>         | %     | <i>n</i>    | %     | <i>n</i>    | %     | <i>n</i>    | %     | <i>n</i>      | %      |
| <b>All CP genomes</b>     | 21,195                                                              | 495              | 2.34% | 0           | 0.00% | 0           | 0.00% | 0           | 0.00% | 4,551         | 21.47% |
| <b>Gram-negatives</b>     |                                                                     |                  |       |             |       |             |       |             |       |               |        |
| <i>A. baumannii</i>       | 5,465                                                               | 0                | 0.00% | 0           | 0.00% | 0           | 0.00% | 0           | 0.00% | 2,145         | 39.25% |
| <i>P. aeruginosa</i>      | 2,724                                                               | 1                | 0.04% | 0           | 0.00% | 0           | 0.00% | 0           | 0.00% | 44            | 1.62%  |
| <i>E. coli / Shigella</i> | 1,022                                                               | 47               | 4.60% | 0           | 0.00% | 0           | 0.00% | 0           | 0.00% | 210           | 20.55% |
| <i>K. pneumoniae</i>      | 8,535                                                               | 433              | 5.07% | 0           | 0.00% | 0           | 0.00% | 0           | 0.00% | 1,992         | 23.34% |
| <i>K. oxytoca</i>         | 109                                                                 | 0                | 0.00% | 0           | 0.00% | 0           | 0.00% | 0           | 0.00% | 13            | 11.93% |
| <i>Enterobacter</i> spp.  | 1,036                                                               | 4                | 0.39% | 0           | 0.00% | 0           | 0.00% | 0           | 0.00% | 96            | 9.27%  |
| <i>S. marcescens</i>      | 167                                                                 | 0                | 0.00% | 0           | 0.00% | 0           | 0.00% | 0           | 0.00% | 7             | 4.19%  |
| <i>C. freundii</i>        | 236                                                                 | 1                | 0.42% | 0           | 0.00% | 0           | 0.00% | 0           | 0.00% | 25            | 10.59% |
| <i>M. morgani</i>         | 13                                                                  | 1                | 7.69% | 0           | 0.00% | 0           | 0.00% | 0           | 0.00% | 3             | 23.08% |
| <i>S. enterica</i>        | 19                                                                  | 1                | 5.26% | 0           | 0.00% | 0           | 0.00% | 0           | 0.00% | 2             | 10.53% |
| <i>C. jejuni</i>          | 618                                                                 | 0                | 0.00% | 0           | 0.00% | 0           | 0.00% | 0           | 0.00% | 0             | 0.00%  |
| <b>Gram-positives</b>     |                                                                     |                  |       |             |       |             |       |             |       |               |        |
| <i>C. difficile</i>       | 0                                                                   | 0                | n/a   | 0           | n/a   | 0           | n/a   | 0           | n/a   | 0             | n/a    |
| <i>E. faecium</i>         | 1                                                                   | 0                | 0.00% | 0           | 0.00% | 0           | 0.00% | 0           | 0.00% | 0             | 0.00%  |

**Table S3.** Strains used in this study.

| Strain            | Aminoglycoside Resistance Gene | Gene Variation         | Promoter Strength <sup>a</sup> |
|-------------------|--------------------------------|------------------------|--------------------------------|
| Clinical isolates |                                |                        |                                |
| ATCC 25922        | none                           | -                      | -                              |
| AG173             | <i>aac(3)-IV</i>               | None (native)          | -                              |
| AG380             | <i>aac(3)-IV</i>               | None (native)          | -                              |
| AG381             | <i>aac(3)-IV</i>               | None (native)          | -                              |
| Recombinant       |                                |                        |                                |
| DH5 $\alpha$      | none                           | -                      | -                              |
| EC118             | <i>aac(3)-IV</i>               | None (native)          | +                              |
| EC111             | <i>aac(3)-IV</i>               | None (native)          | ++                             |
| EC119             | <i>aac(3)-IV</i>               | None (native)          | +++                            |
| EC116             | <i>aac(3)-IV</i>               | Truncated <sup>b</sup> | +                              |
| EC110             | <i>aac(3)-IV</i>               | Truncated <sup>b</sup> | ++                             |
| EC117             | <i>aac(3)-IV</i>               | Truncated <sup>b</sup> | +++                            |
| EC109             | <i>aac(3)-IV</i>               | H154A                  | ++                             |
| EC274             | <i>aac(3)-IV</i>               | H124Y                  | +                              |
| EC275             | <i>aac(3)-IV</i>               | D67A                   | +                              |
| EC276             | <i>aac(3)-IV</i>               | E185A                  | +                              |
| EC277             | <i>aac(3)-IV</i>               | D187A                  | +                              |
| EC278             | <i>aac(3)-IV</i>               | E249A                  | +                              |
| EC279             | <i>aac(3)-IV</i>               | E248A E249A            | +                              |
| EC280             | <i>aac(3)-IV</i>               | C247A C250A            | +                              |
| EC281             | <i>aac(3)-IV</i>               | C247S C250S            | +                              |
| EC282             | <i>aac(3)-IV</i>               | W63A                   | +                              |
| EC283             | <i>aac(3)-IV</i>               | W63L                   | +                              |

<sup>a</sup>Insulated constitutive promoters as described by [37]; <sup>b</sup>N-terminal truncation by 9 amino acids corresponding to the reference gene (see Figure S1).

**Table S4.** Aminoglycoside susceptibility of recombinant *E. coli* strains constitutively expressing N-terminally truncated wild-type or mutant *aac(3)-IV* under defined promoter control.

|             | WT      | WT    | WT       | H154A      |
|-------------|---------|-------|----------|------------|
| Strain      | EC116   | EC110 | EC117    | EC109      |
| Promoter    | +       | ++    | +++      | ++         |
| 9-aa leader | no      | no    | no       | no         |
| MIC (mg/L)  |         |       |          |            |
| Apramycin   | 128-256 | >512  | >512     | 1-2        |
| Gentamicin  | 16      | 64    | 128-256  | 0-125-0.25 |
| Tobramycin  | 32      | 128   | 512      | 0.125      |
| Sisomicin   | 4       | 32    | 128      | 0.125      |
| Netilmicin  | 16-32   | 32-64 | 128      | 0.125-0.25 |
| Paromomycin | 4-8     | 16    | 64-128   | 0.5        |
| Amikacin    | 0.5     | 0.5   | 0.25-0.5 | 0.5        |
| Plazomicin  | 0.125   | 0.25  | 0.25     | 0.125      |

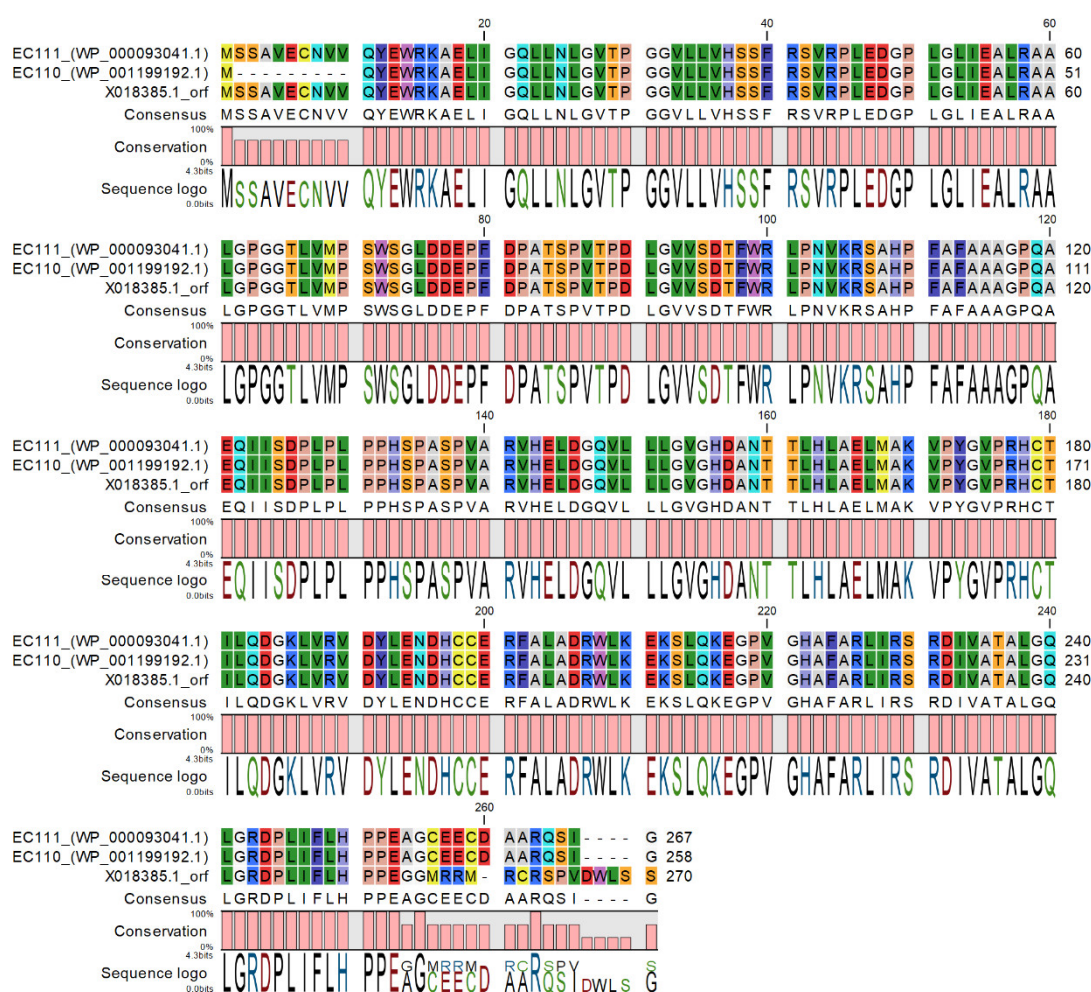

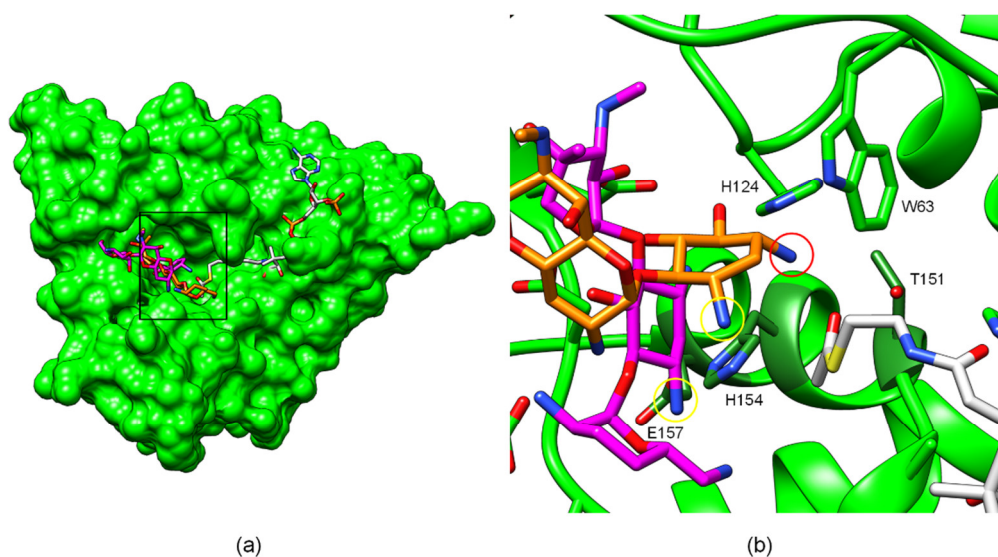

**Figure S2.** AAC(3)-IV activity model showing apramycin (magenta), gentamicin (orange) and acetyl-co-enzyme-A (light grey). This model is based on the published AAC(3)-IV\* H154A models (PDB ID: 6MN3, 6MN4 and 6MN5). The histidine 154 rotamer rotation was modeled based on a AAC(3)-IIIb model (PDB accession: 6mb9) and the acetyl-co-enzyme-A was modeled according to a AAC(3)-VI model (PDB ID: 6BC4). (A) general overview. (B) Magnified view of the active site. The supposed catalytic triade (T151, H154 and E157) is colored in dark green (based on ref [40]). The 3-amino groups of apramycin and gentamicin are indicated by yellow circles. Modification of the 1-amino-group (indicated by a red circle) most likely results in steric hindrance that prevents proper positioning of the 3-amino group for acetylation, drug susceptibility is therefore maintained as observed for 1-*N*-modified amikacin and plazomicin in this study.
